# Supplementary material for: Time-Course Changes in Oxidative Stress and Inflammation in the Retinas of rds Mice: A Retinitis Pigmentosa Model
Source: MDPI journal article supplement (doi:10.3390/antiox11101950), 2022-09-29

Supplementary table 1. Statistical differences between the different control groups and ages for all the studied parameters.

| Area          |    | Number of cell rows in the ONL | TUNEL                  | Rods                   | Cones                  | Avidine                | nNOS                   | GFAP                   |
|---------------|----|--------------------------------|------------------------|------------------------|------------------------|------------------------|------------------------|------------------------|
|               |    | Vs. Other Control Ages         | Vs. Other Control Ages | Vs. Other Control Ages | Vs. Other Control Ages | Vs. Other Control Ages | Vs. Other Control Ages | Vs. Other Control Ages |
| Far periphery | 11 | #                              | &&                     |                        |                        |                        |                        | ++                     |
|               | 17 | #                              |                        |                        |                        |                        |                        | i                      |
|               | 21 |                                |                        |                        |                        |                        |                        | i                      |
|               | 28 |                                |                        |                        |                        |                        |                        | ##                     |
|               | 35 |                                |                        |                        |                        |                        |                        | \$                     |
|               | 42 |                                |                        |                        |                        |                        |                        |                        |
| Mid periphery | 11 |                                | %                      |                        |                        |                        |                        | i                      |
|               | 17 |                                |                        |                        |                        |                        |                        | %                      |
|               | 21 |                                |                        |                        |                        |                        |                        | i                      |
|               | 28 |                                |                        |                        |                        |                        |                        | ###                    |
|               | 35 |                                |                        |                        |                        |                        |                        | \$                     |
|               | 42 |                                |                        |                        |                        |                        |                        |                        |
| Nerve         | 11 |                                |                        |                        |                        |                        |                        |                        |
|               | 17 |                                |                        |                        |                        |                        |                        |                        |
|               | 21 |                                |                        |                        |                        |                        |                        |                        |
|               | 28 |                                |                        |                        |                        |                        |                        |                        |
|               | 35 |                                |                        |                        |                        |                        |                        |                        |
|               | 42 |                                |                        |                        |                        |                        |                        |                        |
| Total         | 11 | \$                             | \$\$                   | &&                     |                        |                        |                        | %%                     |
|               | 17 | \$                             |                        | &                      |                        |                        | ##                     | i                      |
|               | 21 |                                | \$                     |                        |                        |                        |                        | i                      |
|               | 28 |                                | \$                     |                        |                        |                        |                        | ###                    |
|               | 35 |                                | \$                     |                        |                        |                        |                        | \$                     |
|               | 42 |                                |                        |                        |                        |                        |                        |                        |

| Area          | Age (Day) | Number of branches /<br>Number of cells (Iba1) | Length of branches /<br>Number of cells (Iba1) | CD68                   |
|---------------|-----------|------------------------------------------------|------------------------------------------------|------------------------|
|               |           | Vs. Other Control Ages                         | Vs. Other Control Ages                         | Vs. Other Control Ages |
| Far periphery | 11        |                                                |                                                |                        |
|               | 17        |                                                |                                                |                        |
|               | 21        |                                                |                                                |                        |
|               | 28        |                                                |                                                |                        |
|               | 35        |                                                |                                                |                        |
|               | 42        |                                                |                                                |                        |
| Mid periphery | 11        |                                                |                                                |                        |
|               | 17        |                                                |                                                |                        |
|               | 21        |                                                |                                                |                        |
|               | 28        |                                                |                                                |                        |
|               | 35        |                                                |                                                |                        |
|               | 42        |                                                |                                                |                        |
| Nerve         | 11        |                                                |                                                |                        |
|               | 17        |                                                |                                                |                        |
|               | 21        |                                                |                                                |                        |
|               | 28        |                                                |                                                |                        |
|               | 35        |                                                |                                                |                        |
|               | 42        |                                                |                                                |                        |
| Total         | 11        | &&                                             | €€€                                            |                        |
|               | 17        | €                                              | €                                              |                        |
|               | 21        | i                                              | i                                              |                        |
|               | 28        | \$                                             | \$                                             |                        |
|               | 35        | \$                                             |                                                |                        |
|               | 42        |                                                |                                                |                        |

| Area | Age (Days) | 4-HNE                  | GSH-GSSG               |
|------|------------|------------------------|------------------------|
|      |            | Vs. Other Control Ages | Vs. Other Control Ages |
| GCL  | 11         |                        | €                      |
|      | 17         |                        | €                      |
|      | 21         |                        | €                      |
|      | 28         |                        | ###                    |
|      | 35         |                        |                        |
|      | 42         |                        |                        |
| IPL  | 11         |                        |                        |
|      | 17         |                        |                        |
|      | 21         |                        |                        |
|      | 28         |                        |                        |
|      | 35         |                        |                        |
|      | 42         |                        |                        |
| INL  | 11         |                        | €                      |
|      | 17         |                        | €                      |
|      | 21         |                        | €                      |
|      | 28         |                        | ###                    |
|      | 35         |                        |                        |
|      | 42         |                        |                        |
| OPL  | 11         |                        | +                      |
|      | 17         |                        | €                      |
|      | 21         |                        | €                      |
|      | 28         |                        | ###                    |
|      | 35         |                        |                        |
|      | 42         |                        |                        |
| ONL  | 11         |                        |                        |
|      | 17         |                        |                        |
|      | 21         |                        |                        |
|      | 28         |                        |                        |
|      | 35         |                        |                        |
|      | 42         |                        |                        |
| SL   | 11         |                        |                        |
|      | 17         |                        |                        |
|      | 21         |                        |                        |
|      | 28         |                        |                        |
|      | 35         |                        |                        |
|      | 42         |                        |                        |

| Iba1  | Age<br>(Days) | Far periphery |                              | Mid periphery |                              | Nerve      |                              | Total      |                              |
|-------|---------------|---------------|------------------------------|---------------|------------------------------|------------|------------------------------|------------|------------------------------|
|       |               | Vs.<br>rds    | Vs. Other<br>Control<br>Ages | Vs.<br>rds    | Vs. Other<br>Control<br>Ages | Vs.<br>rds | Vs. Other<br>Control<br>Ages | Vs.<br>rds | Vs. Other<br>Control<br>Ages |
| GCL   | 11            | *             | &&&                          | *             | &&&                          | *          | &&&                          | *          | &&&                          |
|       | 17            | *             | &&&                          |               | &&&                          |            |                              |            | &&&                          |
|       | 21            | *             | ##                           | *             | ##                           | *          |                              | *          | ##                           |
|       | 28            | *             |                              | *             |                              | *          |                              | *          |                              |
|       | 35            | *             |                              | *             |                              | *          |                              | *          |                              |
|       | 42            | *             |                              | *             |                              | *          |                              | *          |                              |
| IPL   | 11            |               | %%%                          |               | %%%                          | *          | %%%                          |            | @                            |
|       | 17            | *             | \$                           | *             |                              | *          |                              | *          |                              |
|       | 21            | *             | \$                           | *             | \$                           | *          | \$                           | *          | \$                           |
|       | 28            | *             | \$                           | *             | \$                           | *          | \$                           | *          | \$                           |
|       | 35            | *             |                              |               |                              | *          |                              | *          |                              |
|       | 42            | *             |                              |               |                              |            |                              | *          |                              |
| INL   | 11            |               | @@                           | *             |                              |            |                              | *          |                              |
|       | 17            | *             |                              | *             | &                            | *          |                              | *          |                              |
|       | 21            | *             |                              | *             |                              | *          |                              | *          |                              |
|       | 28            |               |                              |               |                              |            |                              |            |                              |
|       | 35            |               |                              |               |                              |            |                              |            |                              |
|       | 42            |               |                              |               |                              |            |                              |            |                              |
| OPL   | 11            |               | %%                           | *             | %%                           | *          |                              | *          | %%                           |
|       | 17            |               | %%                           |               | %%                           |            |                              |            | %%                           |
|       | 21            | *             | %%                           | *             | %%                           | *          |                              | *          | %%                           |
|       | 28            | *             | %%                           | *             | %%                           | *          |                              | *          | %%                           |
|       | 35            | *             | \$                           | *             |                              | *          |                              | *          | \$                           |
|       | 42            | *             |                              |               |                              |            |                              | *          |                              |
| ONL   | 11            |               |                              |               |                              |            |                              |            |                              |
|       | 17            | *             |                              |               |                              |            |                              | *          |                              |
|       | 21            | *             |                              | *             |                              | *          |                              | *          |                              |
|       | 28            |               |                              | *             |                              | *          |                              | *          |                              |
|       | 35            |               |                              | *             |                              | *          |                              | *          |                              |
|       | 42            |               |                              | *             |                              | *          |                              | *          |                              |
| Total | 11            | *             | %%%                          | *             | &&&                          | *          | %%%                          | *          | €€                           |
|       | 17            | *             |                              | *             |                              | *          |                              | *          |                              |
|       | 21            | *             |                              | *             | \$                           | *          |                              | *          | \$                           |
|       | 28            | *             |                              | *             |                              | *          |                              | *          |                              |
|       | 35            | *             |                              | *             |                              | *          |                              | *          |                              |
|       | 42            | *             |                              | *             |                              | *          |                              | *          |                              |

| Sign   | Difference vs. other ages |    |    |    |    |    |
|--------|---------------------------|----|----|----|----|----|
|        | 11                        | 17 | 21 | 28 | 35 | 42 |
| #      |                           |    | 21 | 28 | 35 | 42 |
| ##     |                           |    |    | 28 | 35 | 42 |
| ###    |                           |    |    |    | 35 | 42 |
| \$     |                           |    |    |    |    | 42 |
| \$\$   |                           | 17 | 21 | 28 | 35 |    |
| \$\$\$ |                           |    | 21 |    |    | 42 |
| &      |                           |    | 21 |    | 35 | 42 |
| &&     |                           | 17 | 21 | 28 | 35 | 42 |
| &&&    |                           |    | 21 |    |    |    |
| %      |                           |    | 21 | 28 | 35 |    |
| %%     |                           |    |    |    | 35 |    |
| %%%    |                           |    | 21 | 28 |    |    |
| +      |                           | 17 |    | 28 |    |    |
| ++     |                           | 17 | 21 |    | 35 | 42 |
| +++    |                           | 17 | 21 |    |    |    |
| i      |                           | 17 |    |    |    |    |
| ii     |                           | 17 | 21 | 28 |    | 42 |
| iii    |                           | 17 |    |    |    |    |
| €      |                           |    |    | 28 |    |    |
| €€     |                           |    |    | 28 |    | 42 |
| €€€    |                           | 17 |    | 28 | 35 | 42 |
| @      |                           | 17 | 21 | 28 |    |    |
| @@     |                           |    | 21 | 28 |    | 42 |
| @@@    |                           |    | 21 |    | 35 |    |

Supplementary Figure S1. Representation of the areas used to quantify the row of nuclei and (immune)fluorescence. Sections I a and b correspond to nerve area; Sections II a and b correspond to mid periphery retina and sections III a and b correspond to far periphery retina. The total measurement of each area is approximately 800  $\mu\text{m}$ .

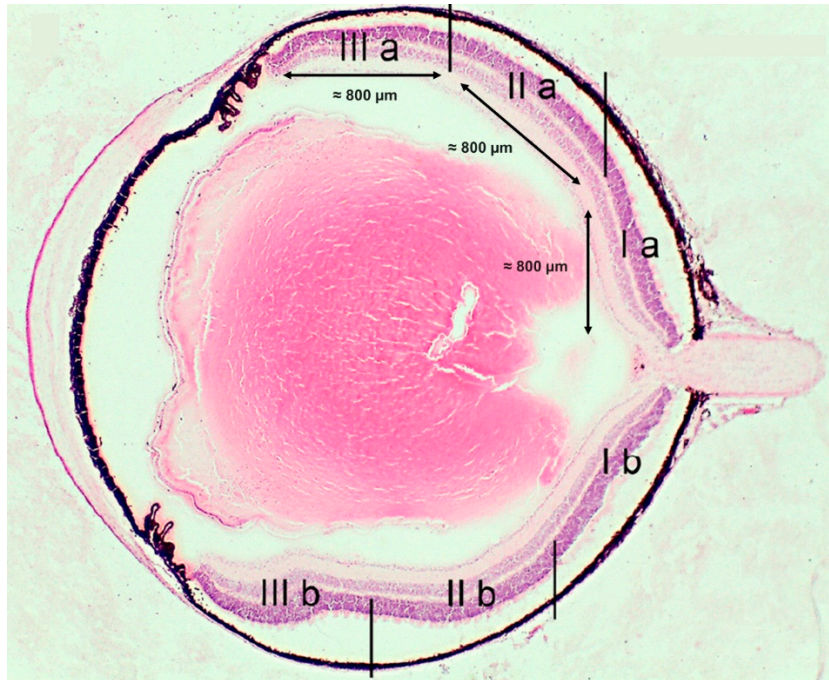

Supplementary Figure S2. Representation of a negative control staining with the secondary antibody Alexa Fluor® 488 goat Anti-rabbit IgG. Image correspond to a PN17 rds retina.

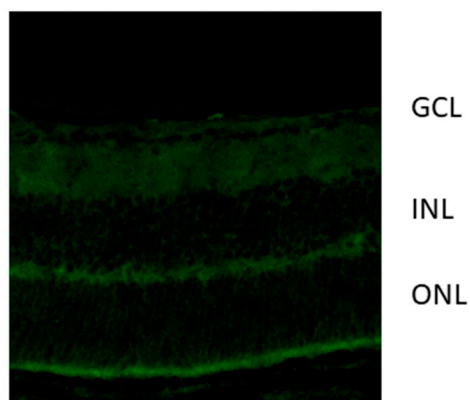

Supplement: s1 [file s1]
